# Supplementary material for: Intermetallic MnNi3 phase separated from nanoporous nickel as hydrogen evolution electrocatalyst in basic media
Source: Royal Society of Chemistry journal article supplement (doi:10.1039/d4se00685b), 2024-01-01
Supplement: d4se00685b1.pdf [file d4se00685b1.pdf]

## Supplementary materials

### **Intermetallic MnNi<sub>3</sub> phase separated from nanoporous nickel as hydrogen evolution electrocatalyst in basic media**

Fengping Ning,<sup>a,#</sup> Mei Wang,<sup>a,#,\*</sup> Huifang Zhao,<sup>a</sup> Guanshui Ma,<sup>b</sup> Jianfang Meng,<sup>a,c</sup>

Ruifeng Dong,<sup>a</sup> Hua Hou,<sup>d,\*</sup> Xiaoguang Wang<sup>e,\*</sup>

<sup>a</sup> School of Mechanical Engineering & School of Materials Science and Engineering & School of Semiconductor and Physics, North University of China, Taiyuan 030051, China

<sup>b</sup> Key Laboratory of Advanced Marine Materials, Ningbo Institute of Materials Technology and Engineering, Chinese Academy of Sciences, Ningbo 315201, China

<sup>c</sup> Zhejiang Easyclean Environmental Technology Co.,Ltd., Pinghu 314200, China

<sup>d</sup> School of Materials Science and Engineering, Taiyuan University of Science and Technology, Taiyuan 030024, China

<sup>e</sup> Laboratory of Advanced Materials and Energy Electrochemistry, School of Materials Science and Engineering, Taiyuan University of Technology, Taiyuan 030024, China

# These authors contributed equally to this work.

\* Corresponding author: wangmei@nuc.edu.cn, houhua@nuc.edu.cn, wangxiaog1982@163.com

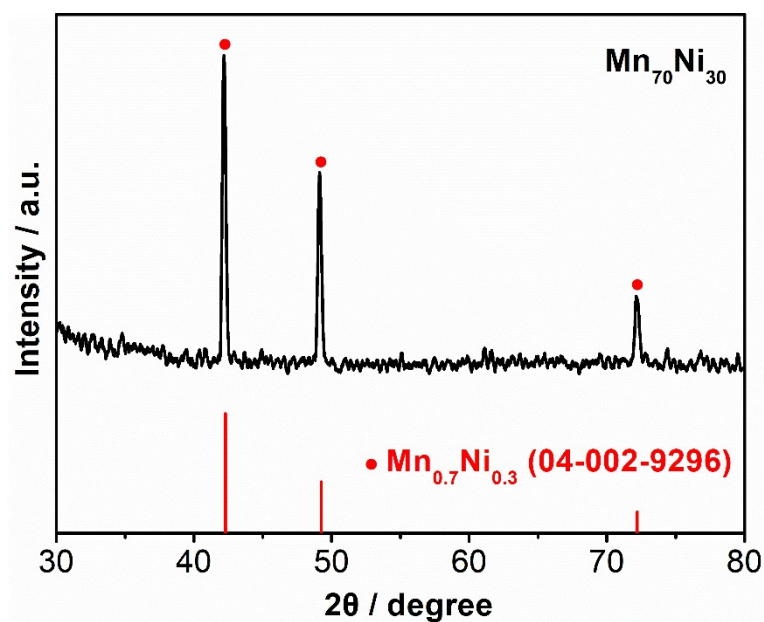

Fig. S1 XRD pattern of  $\text{Mn}_{70}\text{Ni}_{30}$  initial alloy.

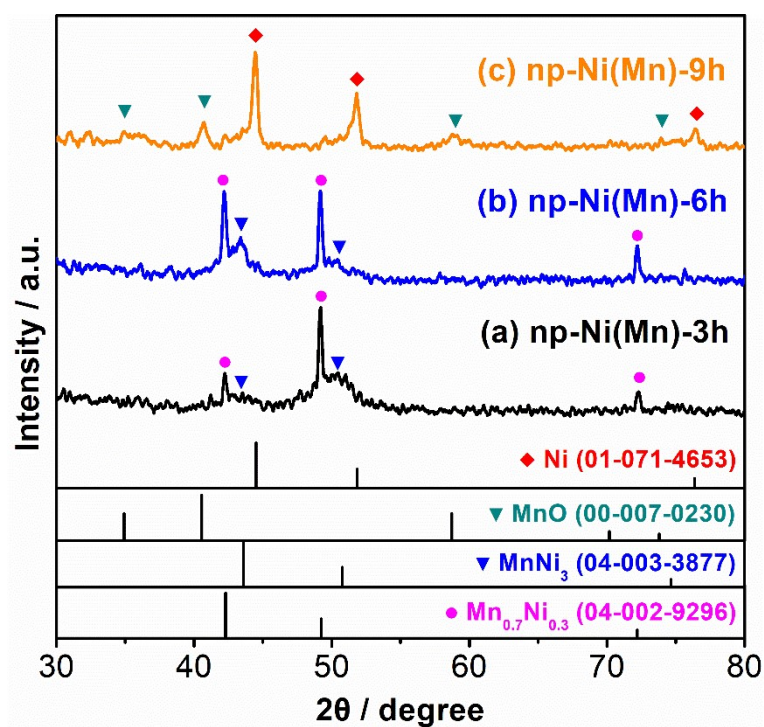

Fig. S2 XRD patterns of dealloyed catalysts: (a) np-Ni(Mn)-3h, (b) np-Ni(Mn)-6h and (c) np-Ni(Mn)-9h.

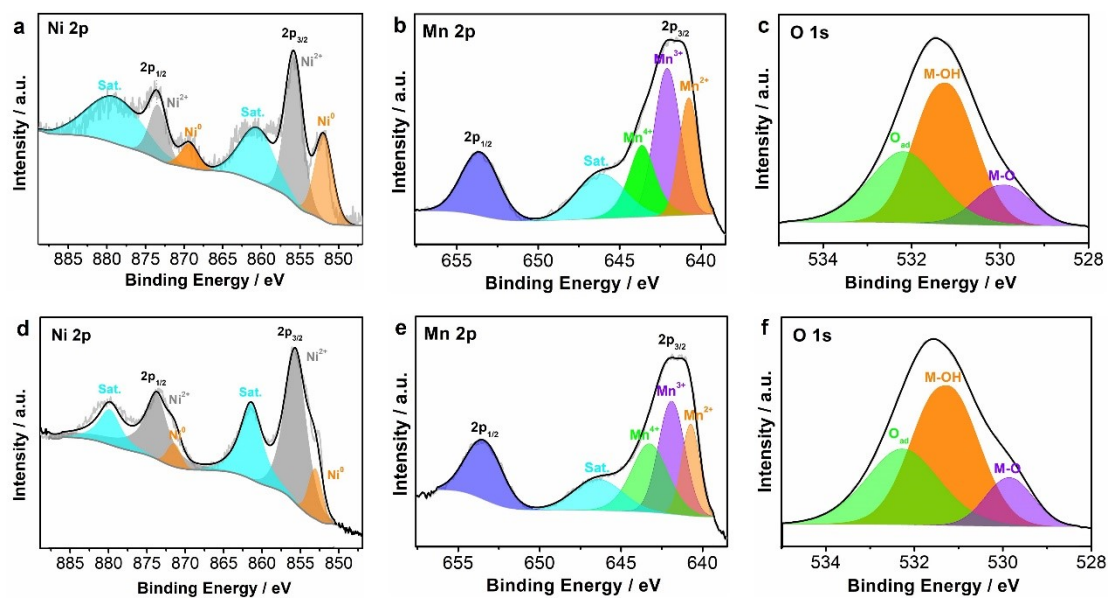

**Fig. S3** XPS spectra of  $MnNi_3/np-Ni-3h$  electrode: (a) Ni 2p, (b) Mn 2p, (c) O 1s.

XPS spectra of  $MnNi_3/np-Ni-6h$  electrode: (d) Ni 2p, (e) Mn 2p, (f) O 1s.

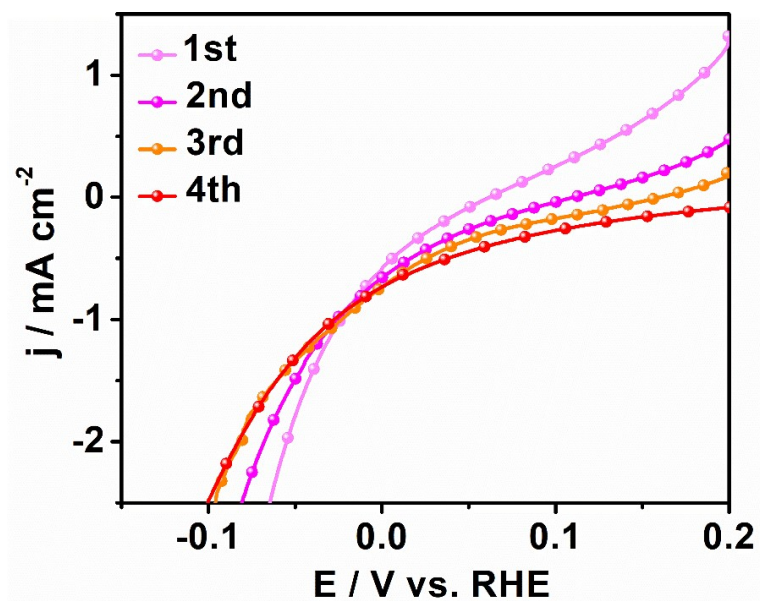

Fig. S4 Initial four LSV curves of MnNi<sub>3</sub>/np-Ni-9h electrode.

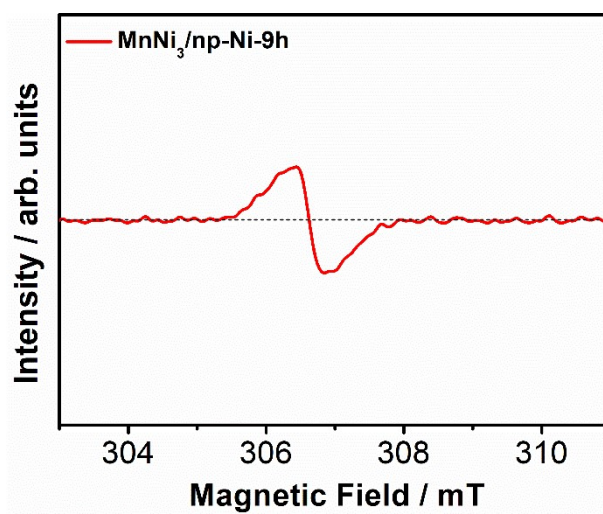

Fig. S5 EPR spectra of MnNi<sub>3</sub>/np-Ni-9h electrode.

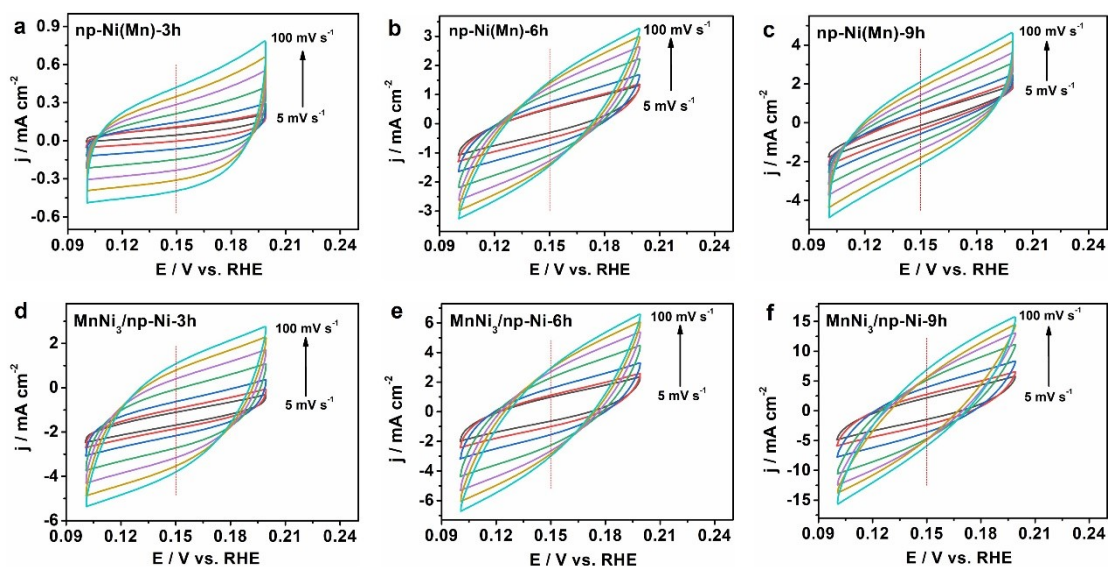

**Fig. S6** CV curves (0.1~0.2 V vs. RHE) of (a) np-Ni(Mn)-3h, (b) np-Ni(Mn)-6h, (c) np-Ni(Mn)-9h, (d) MnNi<sub>3</sub>/np-Ni-3h, (e) MnNi<sub>3</sub>/np-Ni-6h and (f) MnNi<sub>3</sub>/np-Ni-9h electrodes under different scan rates (5~100 mV s<sup>-1</sup>).

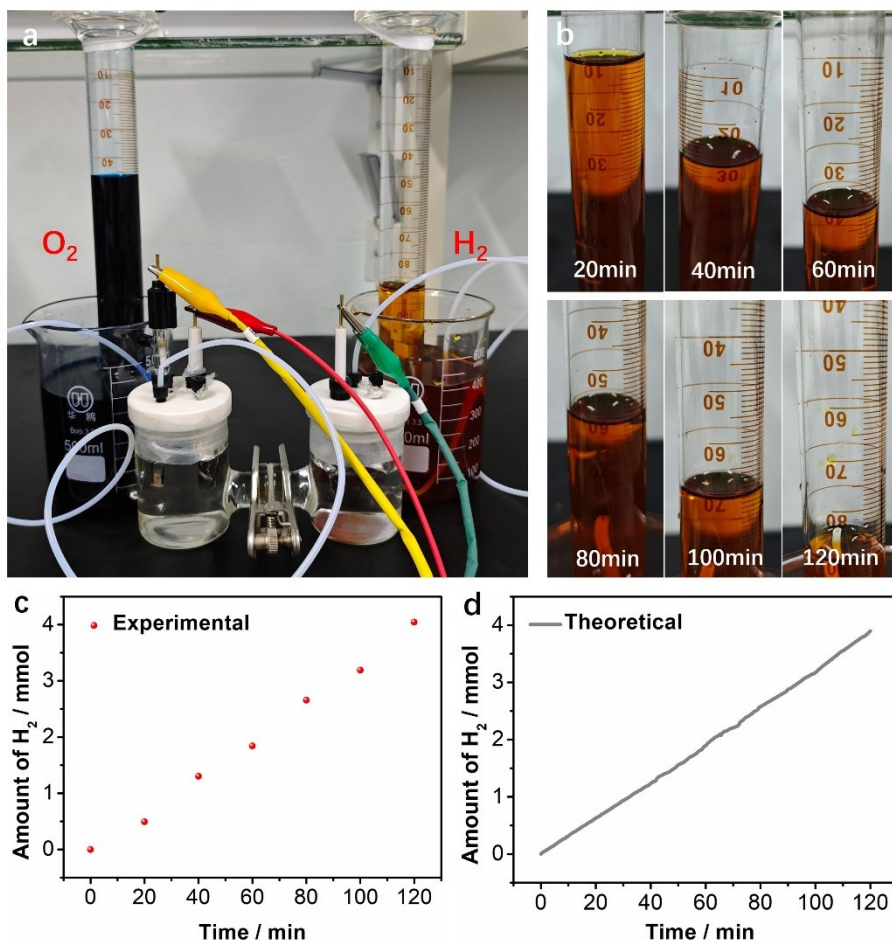

**Fig. S7** (a) Photograph of hydrogen production/collection device. (b) Photographs of H<sub>2</sub> yield at constant potential of 300 mV within 120 min. (c) Actual H<sub>2</sub> yield calculated by formula S1. (d) Theoretical H<sub>2</sub> yield calculated by formula S2.

$$n(\text{mol}) = \frac{\rho \cdot V}{M} = \frac{0.0899(\text{g/L}) \cdot V(\text{L})}{2(\text{g/mol})} \quad (\text{S1})$$

$$n(\text{mol}) = \frac{I \cdot t}{2 \cdot F} = \frac{I(\text{A}) \cdot t(\text{s})}{2 \cdot 96485} \quad (\text{S2})$$



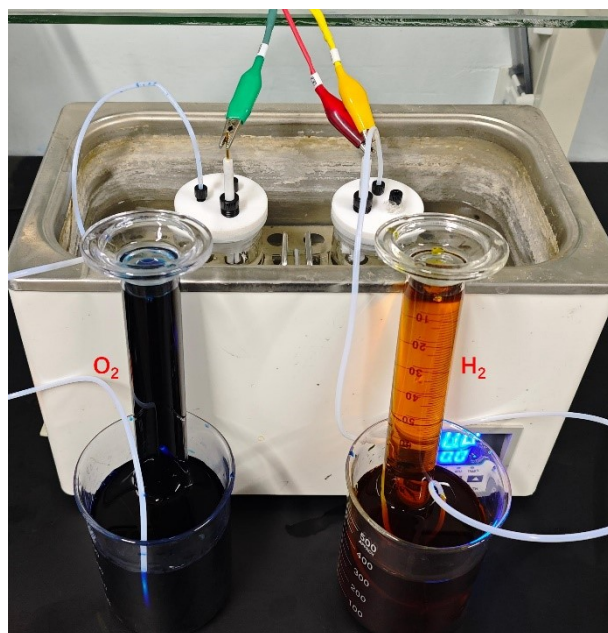

**Fig. S8** Photograph of hydrogen production/collection device under industrial conditions (6M KOH, 60 °C).

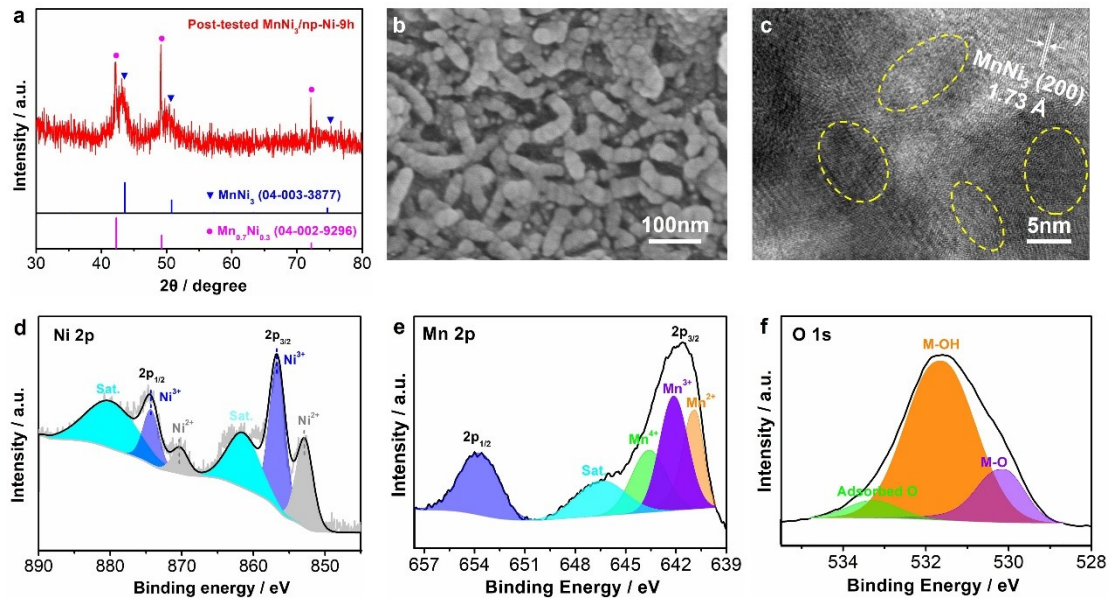

**Fig. S9** (a) XRD pattern, (b) SEM image, (c) HRTEM image of post-tested MnNi<sub>3</sub>/np-Ni-9h. XPS spectra of post-tested MnNi<sub>3</sub>/np-Ni-9h: (D) Ni 2p, (E) Mn 2p, (F) O 1s.



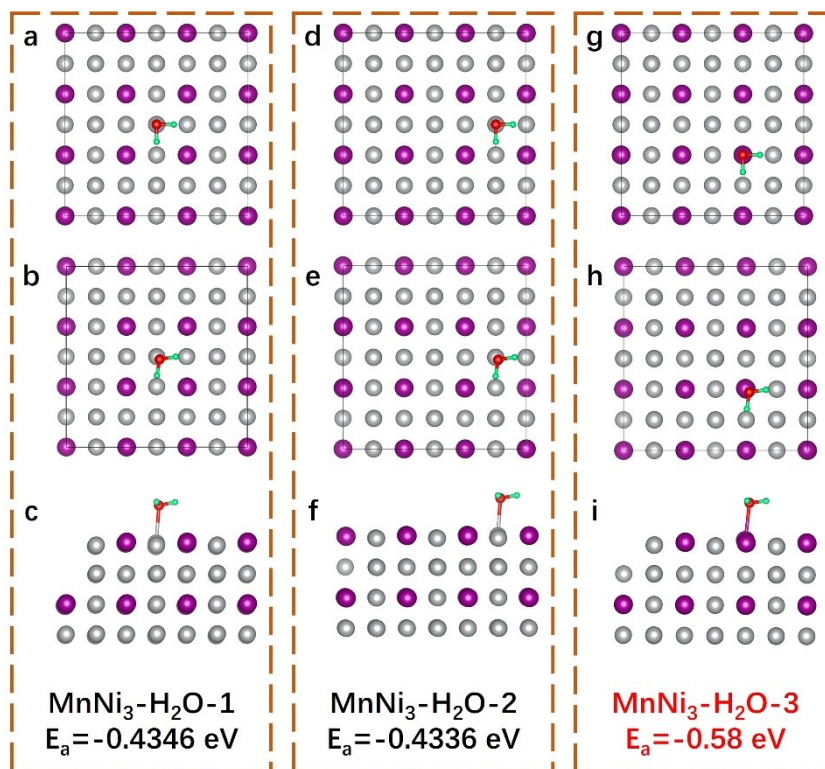

**Fig. S10** (a, d, g) \*H<sub>2</sub>O adsorption models of MnNi<sub>3</sub> on different metal sites. (b, e, h) Top view of optimized \*H<sub>2</sub>O adsorption models. (c, f, i) Side view and corresponding adsorption energies of optimized \*H<sub>2</sub>O adsorption models.

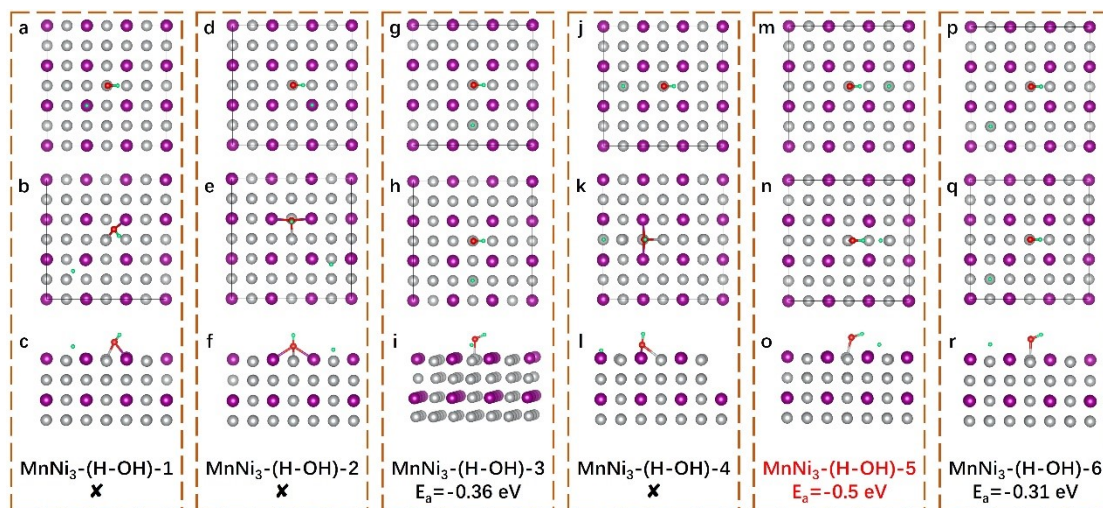

**Fig. S11** (a, d, g, j, m, p)  $\ast(\text{OH-H})$  adsorption models of  $\text{MnNi}_3$  on different metal sites. (b, e, h, k, n, q) Top view of optimized  $\ast(\text{OH-H})$  adsorption models. (c, f, i, l, o, r) Side view and corresponding adsorption energies of optimized  $\ast(\text{OH-H})$  adsorption models.

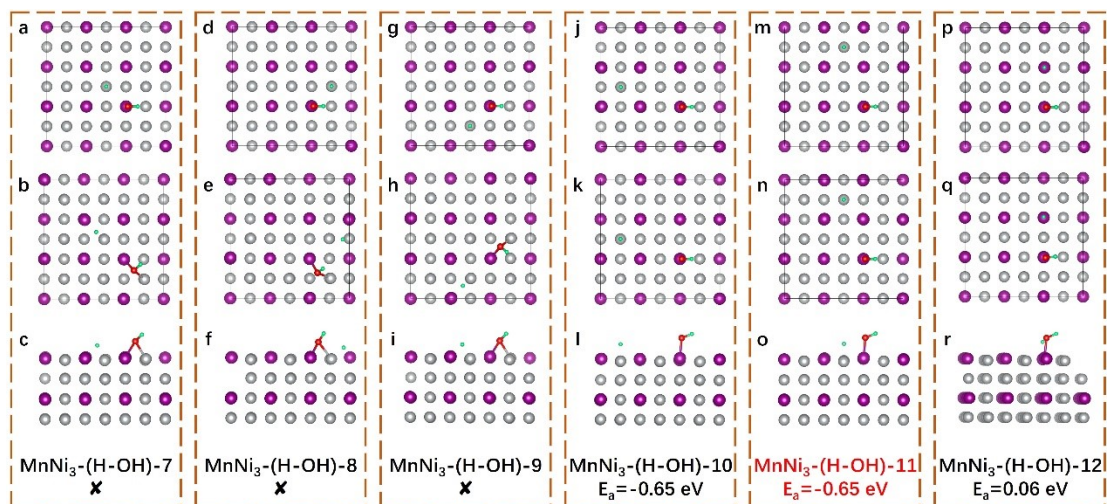

**Fig. S12** (a, d, g, j, m, p)  $^*(\text{OH-H})$  adsorption models of  $\text{MnNi}_3$  on different metal sites. (b, e, h, k, n, q) Top view of optimized  $^*(\text{OH-H})$  adsorption models. (c, f, i, l, o, r) Side view and corresponding adsorption energies of optimized  $^*(\text{OH-H})$  adsorption models.

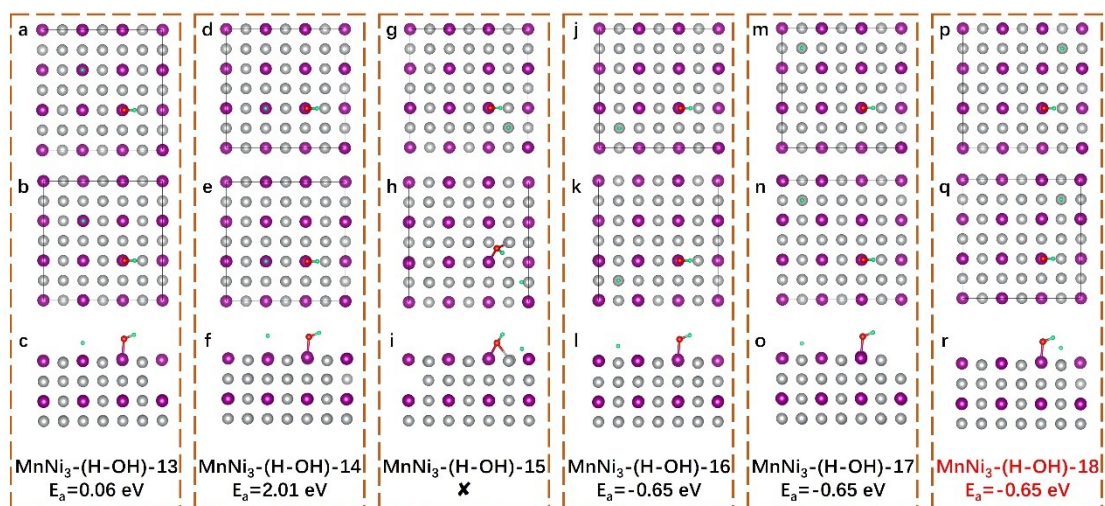

**Fig. S13** (a, d, g, j, m, p) \*(OH-H) adsorption models of MnNi<sub>3</sub> on different metal sites. (b, e, h, k, n, q) Top view of optimized \*(OH-H) adsorption models. (c, f, i, l, o, r) Side view and corresponding adsorption energies of optimized \*(OH-H) adsorption models.

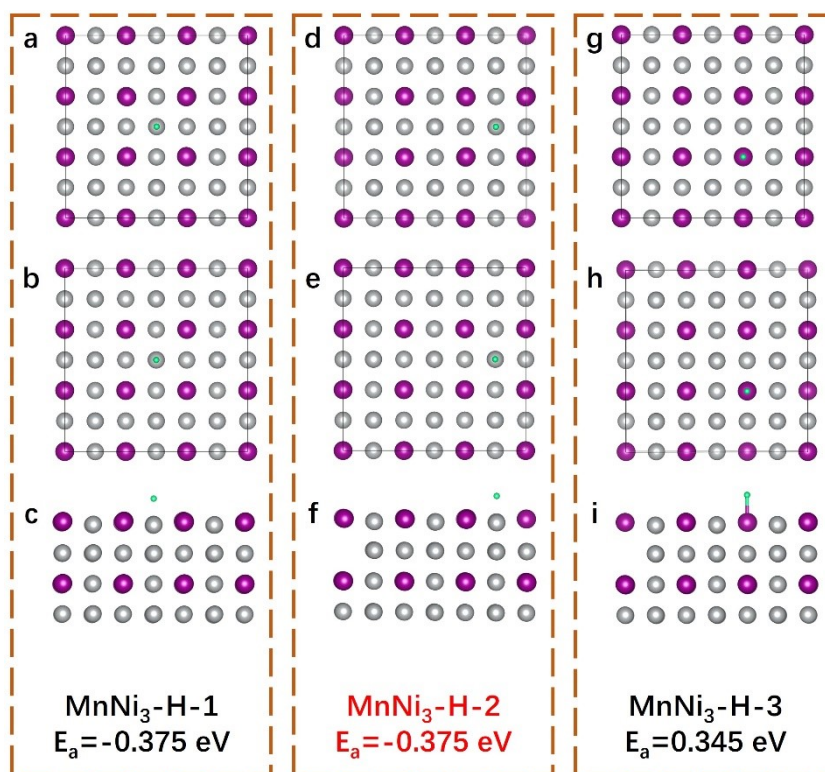

**Fig. S14** (a, d, g) \*H adsorption models of MnNi<sub>3</sub> on different metal sites. (b, e, h) Top view of optimized \*H adsorption models. (c, f, i) Side view and corresponding adsorption energies of optimized \*H adsorption models.

**Table S1** Comparison of HER performance in 1 M KOH for the as-prepared catalysts in this study with the other reported catalysts in literatures.

| Catalysts                                                                         | $\eta_{10}$ (mV) | Tafel slope (mV dec <sup>-1</sup> ) | Reference |
|-----------------------------------------------------------------------------------|------------------|-------------------------------------|-----------|
| np-Ni(Mn)-3h                                                                      | 305              | 192                                 |           |
| np-Ni(Mn)-6h                                                                      | 291              | 145                                 |           |
| np-Ni(Mn)-9h                                                                      | 228              | 133                                 |           |
| MnNi <sub>3</sub> /np-Ni-3h                                                       | 249              | 161                                 | This work |
| MnNi <sub>3</sub> /np-Ni-6h                                                       | 195              | 119                                 |           |
| MnNi <sub>3</sub> /np-Ni-9h                                                       | <b>107</b>       | <b>85</b>                           |           |
| Pt/C (m=0.32 mg cm <sup>-2</sup> )                                                | 90               | 93                                  |           |
| Pt/C (m=0.34 mg cm <sup>-2</sup> )                                                | 62               | 68                                  | 1         |
| Pt/C (m=1 mg cm <sup>-2</sup> )                                                   | 39               | 58                                  | 2         |
| Mo <sub>2</sub> C-Ni(OH) <sub>2</sub>                                             | 119              | 81.4                                | 3         |
| Co-1T-MoS <sub>2</sub> -bpe                                                       | 118              | 83                                  | 4         |
| NiS@CoNi <sub>2</sub> S <sub>4</sub> /NC                                          | 126              | 47.2                                | 5         |
| CoP/MoP@NPC                                                                       | 211              | 64.6                                | 6         |
| Mo <sub>6</sub> Co <sub>7</sub> -20h                                              | 165              | --                                  | 7         |
| N, S-doped Mo <sub>2</sub> C-Mo/C                                                 | 118              | 74                                  | 8         |
| CoSe <sub>2</sub> /Co <sub>3</sub> S <sub>4</sub> @Co <sub>3</sub> O <sub>4</sub> | 165              | 117.7                               | 9         |
| $\alpha$ -MoB <sub>2</sub>                                                        | 124              | 61                                  | 10        |
| MoNiS/Mo <sub>2</sub> TiC <sub>2</sub> T <sub>x</sub>                             | 153              | 92                                  | 11        |



**Table S2** EIS parameters obtained by fitting the Nyquist plots to the equivalent circuit model in 1 M KOH at -0.1 V vs. RHE.

| <b>Catalysts</b>                 | $R_s / \Omega$ | $R_0 / \Omega$ | $R_{ct} / \Omega$ |
|----------------------------------|----------------|----------------|-------------------|
| <b>np-Ni(Mn)-3h</b>              | 0.756          | —              | 150.86            |
| <b>np-Ni(Mn)-6h</b>              | 0.685          | —              | 123.29            |
| <b>np-Ni(Mn)-9h</b>              | 1.434          | —              | 59.67             |
| <b>MnNi<sub>3</sub>/np-Ni-3h</b> | 1.574          | 0.417          | 8.008             |
| <b>MnNi<sub>3</sub>/np-Ni-6h</b> | 0.418          | 0.346          | 3.885             |
| <b>MnNi<sub>3</sub>/np-Ni-9h</b> | 0.982          | 0.308          | 3.220             |

**Table S3** AWE activities of MnNi<sub>3</sub>/np-Ni-9h || RuO<sub>2</sub> electrolyzer along with other reported catalysts.

| Couple                                                                                     | Cell voltage (V)                | Condition     | Reference |
|--------------------------------------------------------------------------------------------|---------------------------------|---------------|-----------|
|                                                                                            | 1.54 V@100 mA cm <sup>-2</sup>  |               |           |
| <b>MnNi<sub>3</sub>/np-Ni-9h    RuO<sub>2</sub></b>                                        | 1.73 V@500 mA cm <sup>-2</sup>  | 60°C, 6M KOH  | This work |
|                                                                                            | 1.90 V@1000 mA cm <sup>-2</sup> |               |           |
| Ni <sub>2</sub> P-NiMoO <sub>x</sub> /NF    Ni <sub>2</sub> P-NiMoO <sub>x</sub> /NF       | 1.66 V@100 mA cm <sup>-2</sup>  | 65°C, 30% KOH | 12        |
|                                                                                            | 2.08 V@400 mA cm <sup>-2</sup>  |               |           |
| Mo <sub>0.25</sub> NiFe    Mo <sub>0.25</sub> NiFe                                         | 1.85V@100 mA cm <sup>-2</sup>   | 30% KOH       | 13        |
| Fe-Ni <sub>3</sub> S <sub>2</sub> /PNF-5    Fe-Ni <sub>3</sub> S <sub>2</sub> /PNF-5       | 1.75 V@400 mA cm <sup>-2</sup>  | 85°C, 30% KOH | 14        |
| NiMoB    NiMoB                                                                             | 2.1 V@500 mA cm <sup>-2</sup>   | 60°C, 6M KOH  | 15        |
| Ni/MoO <sub>2</sub> @CN    Ni/MoO <sub>2</sub> @CN                                         | 1.73 V@200 mA cm <sup>-2</sup>  | 60°C, 6M KOH  | 16        |
| NiCo@C-NiCoMoO/NF    NiCo@C-NiCoMoO/NF                                                     | 1.8 V@500 mA cm <sup>-2</sup>   | 60°C, 6M KOH  | 17        |
| Fe <sub>0.14</sub> Co <sub>0.86</sub> -P/CC    Fe <sub>0.14</sub> Co <sub>0.86</sub> -P/CC | 1.95 V@500 mA cm <sup>-2</sup>  | 30% KOH       | 18        |
|                                                                                            | 2.14 V@1000 mA cm <sup>-2</sup> |               |           |
| FeIr/NF    FeIr/NF                                                                         | 1.75 V@500 mA cm <sup>-2</sup>  | 60°C, 30% KOH | 19        |

## References

- 1 H. Tan, B. Tang, Y. Lu, Q. Ji, L. Lv, H. Duan, N. Li, Y. Wang, S. Feng, Z. Li, C. Wang, F. Hu, Z. Sun and W. Yan, *Nat. Commun.*, 2022, **13**, 2024.
- 2 H. J. Liu, S. Zhang, Y. M. Chai and B. Dong, *Angew. Chem.*, 2023, **235**, e202313845.
- 3 H. C. Fu, X. H. Chen, B. Yang, Y. H. Luo, T. Li, X. H. Wang, Q. Zhang, X. L. Li, N. B. Li and H. Q. Luo, *Appl. Catal. B Environ. Energy*, 2023, **332**, 122739.
- 4 H. J. Liu, S. Zhang, Y. M. Chai and B. Dong, *Angew. Chem. Int. Ed. Engl.*, 2023, **62**, e202313845.
- 5 J. Dang, S. Yun, Y. Zhang, G. Yang, J. Yang, D. Qiao and T. Yang, *J. Colloid Interface Sci.*, 2023, **630**, 91-105.
- 6 S. S. Liu, L. J. Ma and J. S. Li, *J. Colloid Interface Sci.*, 2023, **631**, 147-153.
- 7 Y. Yang, R. Deng, C. Wang, J. Sun, A. K. Iyer, C. C. Laing, H. Yao, S. Ma and M. G. Kanatzidis, *Chem. Mater.*, 2024, **36**, 2566-2576.
- 8 X. Wang, L. Xia, C. Guo, L. Luo, J. Dai, X. Liu, L. He, C. Yang, Y. Xu, B. Zeng and L. Dai, *Appl. Surface Sci.*, 2023, **614**, 156276.
- 9 C. Sun, C. Wang, H. Xie, G. Han, Y. Zhang and H. Zhao, *Small*, 2023, **19**, e2302056.
- 10 X. Liu, Y. Gong, *ACS Appl. Nano Mater.*, 2022, **5**, 10183-10191.
- 11 J. Zhang, W. Zhang, J. Zhang, Y. Li, Y. Wang, L. Yang and S. Yin, *J. Alloys Compd.*, 2023, **935**, 167974.
- 12 J.-T. Ren, L. Chen, H.-Y. Wang, W.-W. Tian, X.-L. Song, Q.-H. Kong and Z.-Y. Yuan, *ACS Catal.*, 2023, **13**, 9792-9805.
- 13 N. S. Gultom, T.-S. Chen, M. Z. Silitonga and D.-H. Kuo, *Appl. Catal. B Environ. Energy*, 2023, **322**, 122103.
- 14 B. Zhong, B. Cheng, Y. Zhu, R. Ding, P. Kuang and J. Yu, *J. Colloid Interface Sci.*, 2023, **629**, 846-853.
- 15 R. Mandavkar, M. A. Habib, S. Lin, R. Kulkarni, S. Burse, J.-H. Jeong and J. Lee, *Appl. Mater. Today*, 2022, **29**, 101579.
- 16 G. Qian, J. Chen, T. Yu, J. Liu, L. Luo and S. Yin, *Nanomicro Lett.*, 2021, **14**, 20.
- 17 G. Qian, J. Chen, T. Yu, L. Luo and S. Yin, *Nanomicro Lett.*, 2021, **13**, 77.
- 18 H. Yu, L. Qi, Y. Hu, Y. Qu, P. Yan, T. T. Isimjan and X. Yang, *J. Colloid Interface Sci.*, 2021, **600**, 811-819.
- 19 J. Chen, Y. Wang, G. Qian, T. Yu, Z. Wang, L. Luo, F. Shen and S. Yin, *Chem. Eng. J.*, 2021, **421**, 129892.
